# Supplementary material for: Synthesis, characterization and photophysical studies of self-assembled azo biphenyl urea derivatives
Source: Royal Society of Chemistry journal article supplement (doi:10.1039/c5pp00357a), 2015-12-14
Supplement: c5pp00357a1.pdf [file c5pp00357a1.pdf]

## Supporting Information

### Synthesis, characterization and photophysical studies of self-assembled azo biphenyl urea derivatives

Jayaraman Sivamani, Rajendiran Balasaravanan, Kumaraguru Duraimurugan,  
and Ayyanar Siva\*

Department of Inorganic Chemistry, School of Chemistry, Madurai Kamaraj University,  
Madurai-21, Tamilnadu, India.

E-mail: drasiva@gmail.com; ptesiva@yahoo.co.in

#### Contents

|                                                                                                                  |        |
|------------------------------------------------------------------------------------------------------------------|--------|
| Schematic representation for <i>trans-cis</i> isomerization of <b>7(7a/7b)</b> .....                             | S2     |
| Optimised geometry of <b>7</b> and its hydrogen bonding structure .....                                          | S2     |
| Absorption and PL spectra of <b>7(7a/7b)</b> in different solvents.....                                          | S3     |
| Absorption and emission values of <b>7(7a/7b)</b> in different solvents (Table 1 and Table 2).....               | S4     |
| Absorbance spectra of Compound <b>7a</b> (a) and <b>7b</b> (b) in different THF: H <sub>2</sub> O fractions..... | S5     |
| Peak intensity plot of <b>7a</b> and <b>7b</b> in different THF: H <sub>2</sub> O fractions.....                 | S5     |
| Selected area electron diffraction pattern of compounds <b>7a</b> and <b>7b</b> .....                            | S6     |
| AFM image of self-assembled molecules <b>7(7a/7b)</b> .....                                                      | S6     |
| FT-IR spectrum of compound <b>7</b> in before (A) and after light irradiation.....                               | S7     |
| DFT-computed molecular frontiers orbitals of <b>7a</b> .....                                                     | S7     |
| TD-DFT electronic transitions of all the compounds.....                                                          | S8     |
| NMR and Mass Spectra of synthesized compounds.....                                                               | S9-S17 |

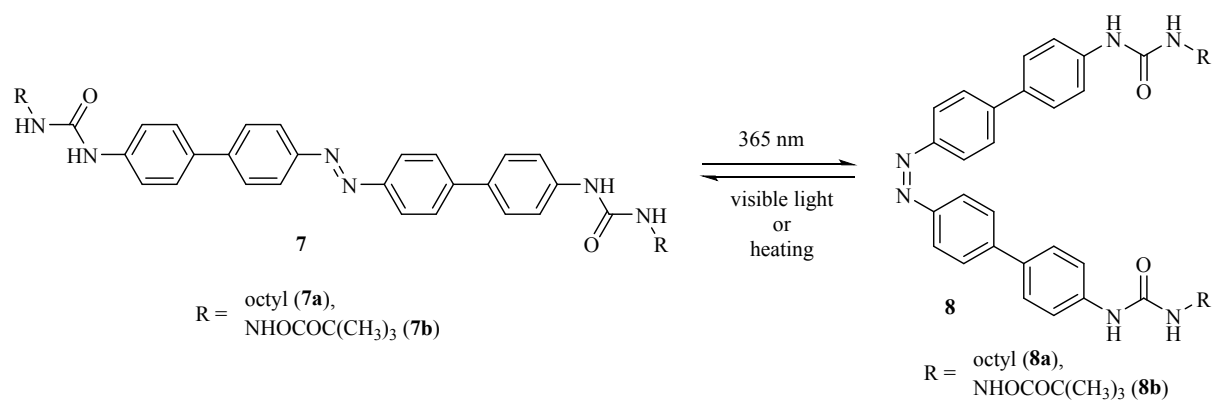

**Scheme 1.** Schematic representation for photo-isomerization reaction of **7(7a/7b)** upon UV and visible light irradiation.

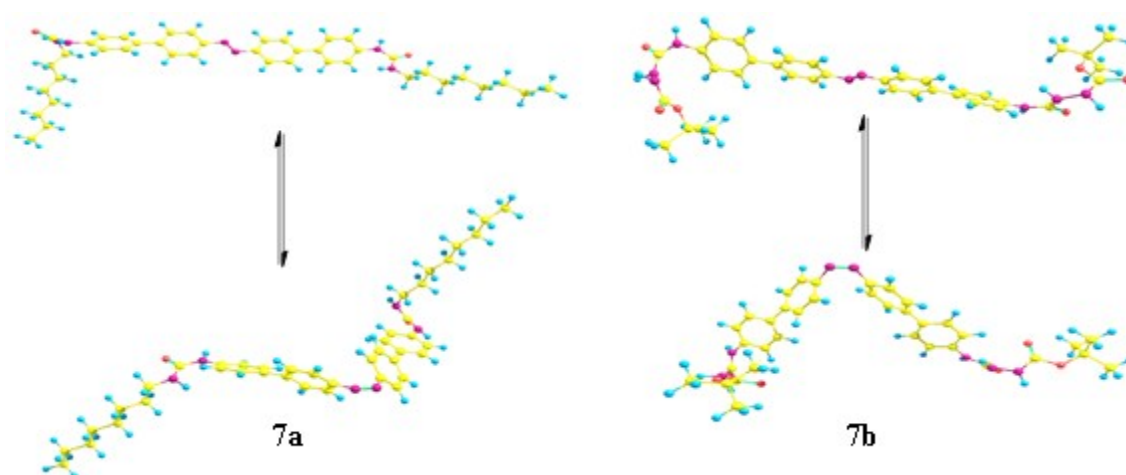

**Scheme 2.** Optimized structure for *trans-cis* isomerization **7(7a/7b)**.

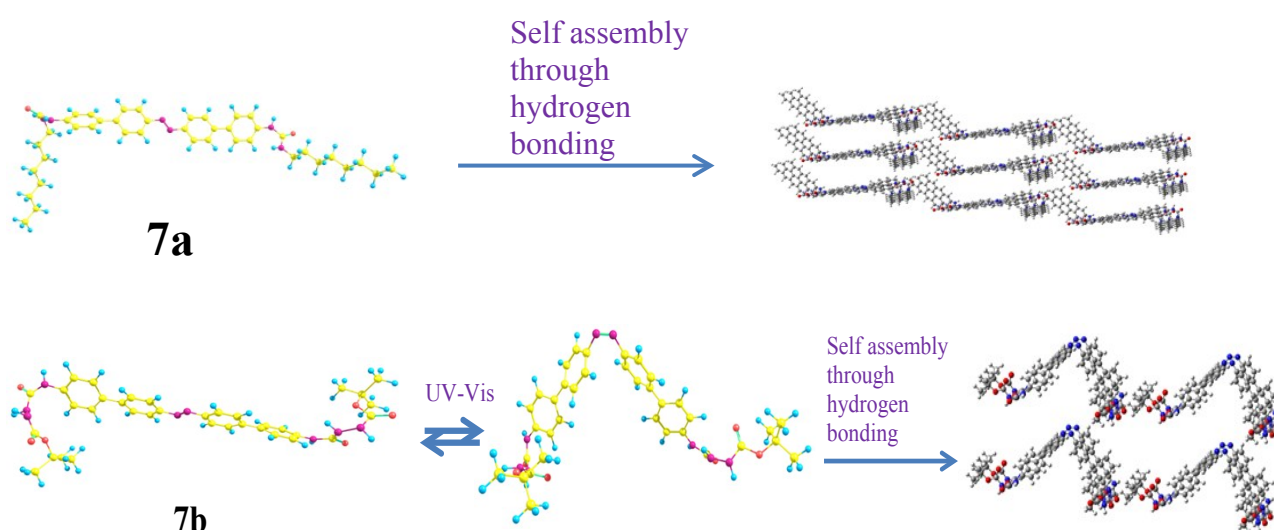

**Scheme 3.** Possible sheet like self-assembly structure of **7a** and **7b** through hydrogen bonding.

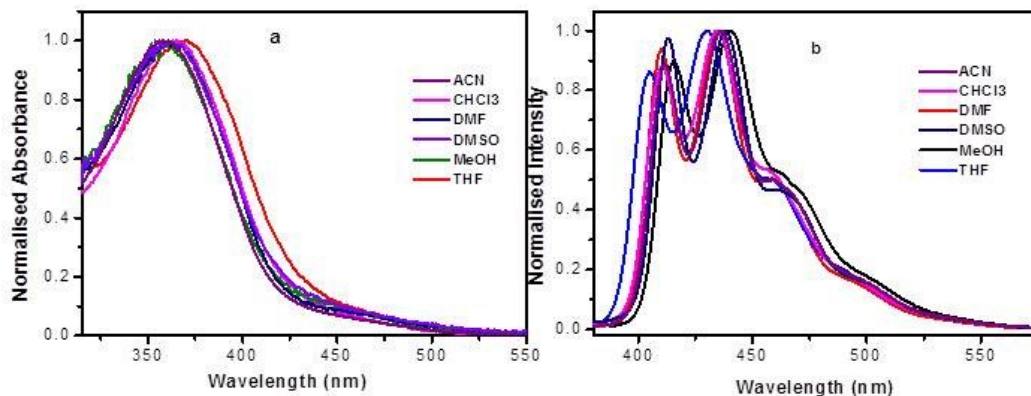

**Fig. S1** Normalized absorption (a) and emission (b) spectra of DPOU (**7a**) in different solvents.

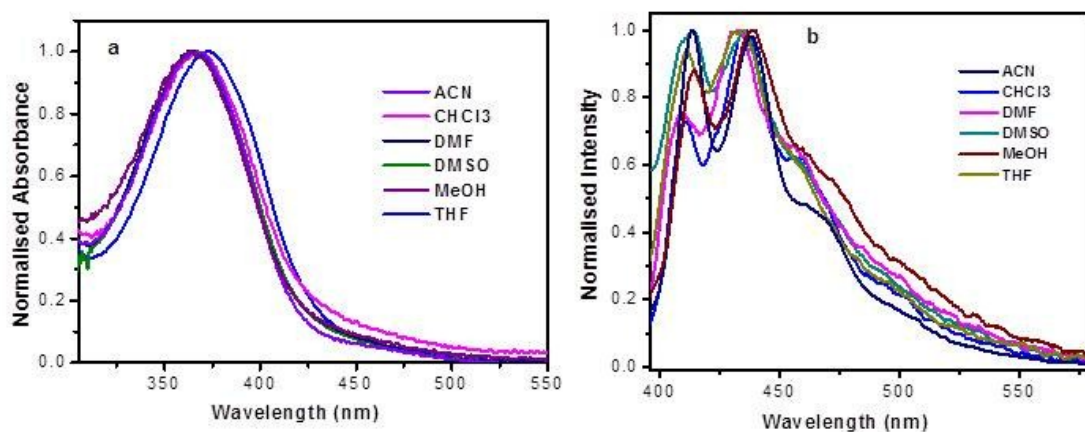

**Fig. S2** Normalized absorption (a) and emission (b) spectra of DPBHU (**7b**) in different solvents.

**Table 1.** Absorption and emission values of **7a** (DPOU) in different solvents.

| <b>Solvents</b>         | $\lambda_{\text{abs}}$ (nm) | $\lambda_{\text{ex}}$ (nm) | $\lambda_{\text{emi}}$ (nm) | <b>Stoke's shift (cm<sup>-1</sup>)</b> |
|-------------------------|-----------------------------|----------------------------|-----------------------------|----------------------------------------|
| <b>THF</b>              | 368                         | 368                        | 406, 431                    | 3972                                   |
| <b>CHCl<sub>3</sub></b> | 365                         | 365                        | 410, 434                    | 4355                                   |
| <b>DMF</b>              | 358                         | 358                        | 409, 434                    | 4891                                   |
| <b>DMSO</b>             | 360                         | 360                        | 413, 438                    | 4947                                   |
| <b>ACN</b>              | 354                         | 354                        | 411, 436                    | 5313                                   |
| <b>MeOH</b>             | 356                         | 356                        | 415, 440                    | 5363                                   |

**Table 2.** Absorption and emission values of **7b** (DPBHU) in different solvents.

| <b>Solvents</b>         | $\lambda_{\text{abs}}$ (nm) | $\lambda_{\text{ex}}$ (nm) | $\lambda_{\text{emi}}$ (nm) | <b>Stoke's shift (cm<sup>-1</sup>)</b> |
|-------------------------|-----------------------------|----------------------------|-----------------------------|----------------------------------------|
| <b>THF</b>              | 372                         | 372                        | 412, 434                    | 3867                                   |
| <b>CHCl<sub>3</sub></b> | 367                         | 367                        | 412, 434                    | 4207                                   |
| <b>DMF</b>              | 365                         | 365                        | 410, 432                    | 4249                                   |
| <b>DMSO</b>             | 365                         | 365                        | 411, 435                    | 4409                                   |
| <b>ACN</b>              | 364                         | 364                        | 413, 438                    | 4641                                   |
| <b>MeOH</b>             | 364                         | 364                        | 415, 439                    | 4719                                   |

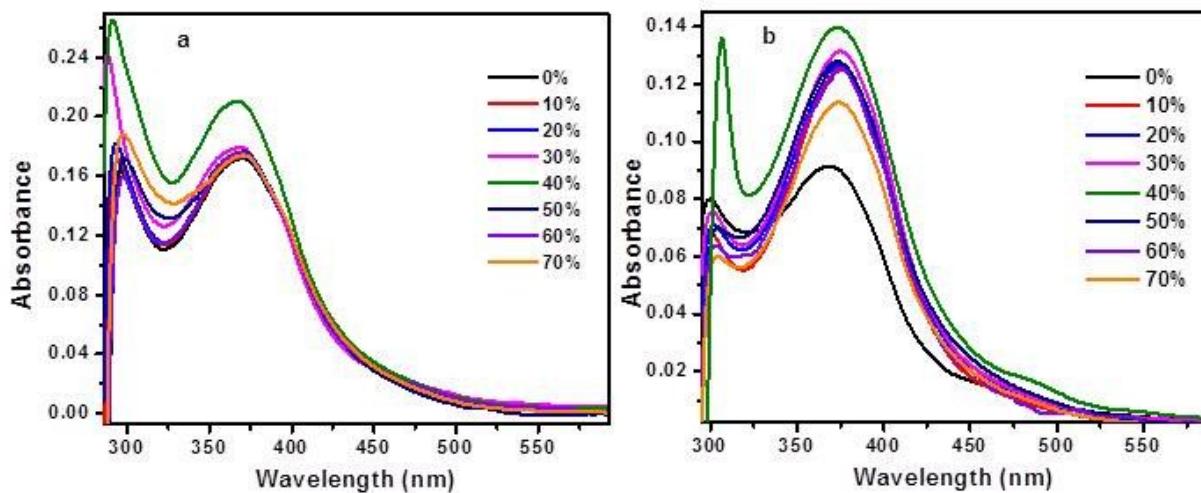

Fig. S3 Absorbance spectra of Compound 7a (a) and 7b (b) in different THF: H<sub>2</sub>O fractions.

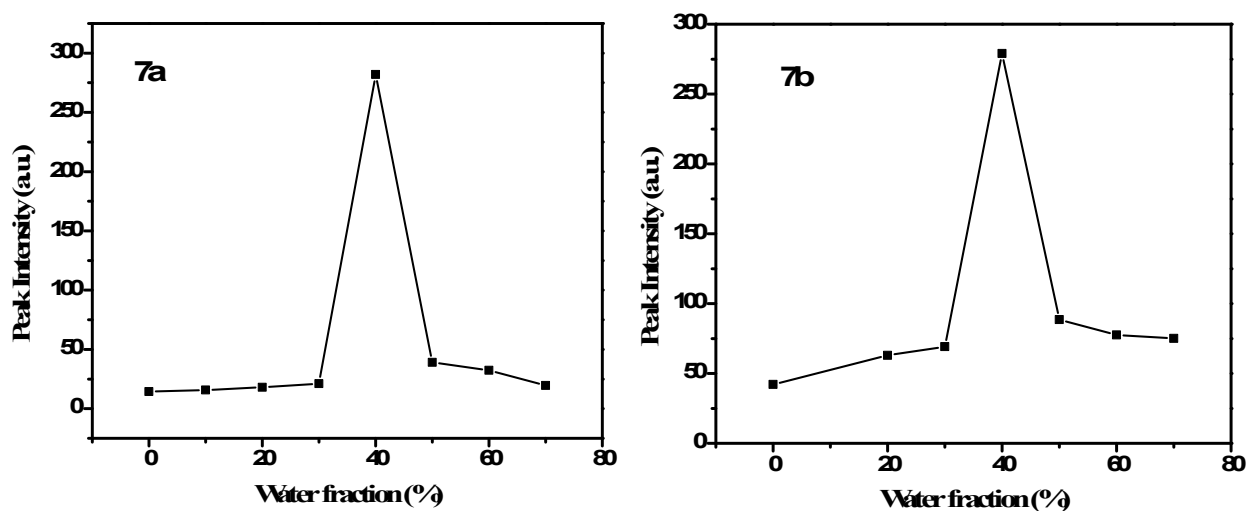

Fig. S4 Peak intensity plot of 7a and 7b in different THF: H<sub>2</sub>O fractions.

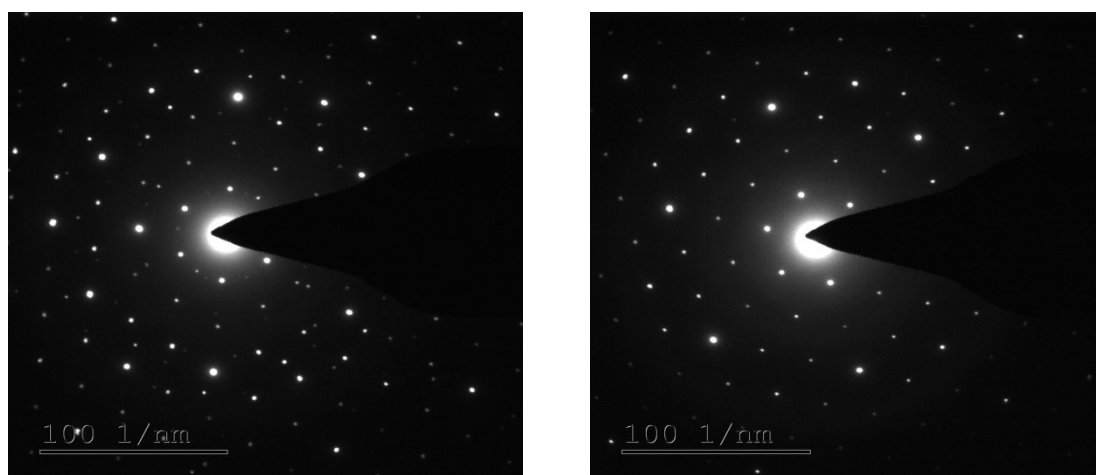

**Fig. S5** Selected area electron diffraction pattern of compounds **7a** and **7b** (from left to right).

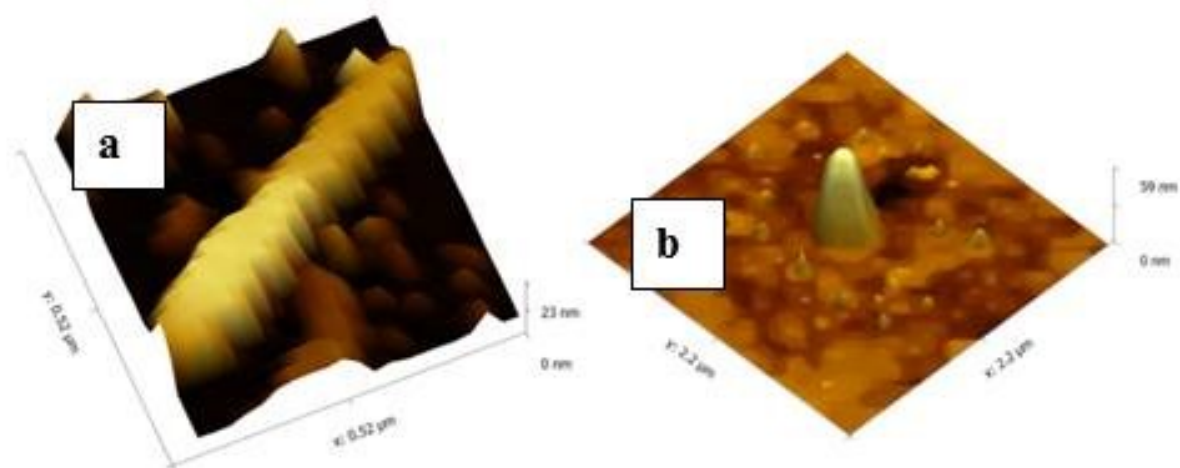

**Fig. S6** AFM image of self-assembled **7a** (a) and **7b** (b) in THF-water mixture (40%) respectively, Samples were prepared by drop casting the solution (THF-water (40%)) of the compound onto a freshly cleaved, glass surface.

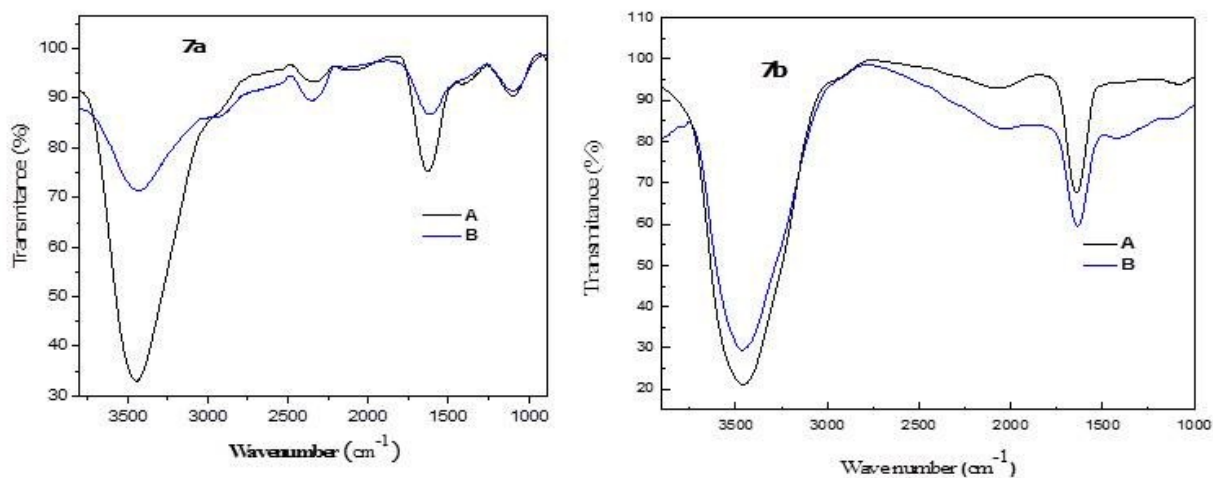

**Fig. S7** FT-IR spectrum of compound **7** taken in before (A) and after (B) light irradiation at 365 nm.

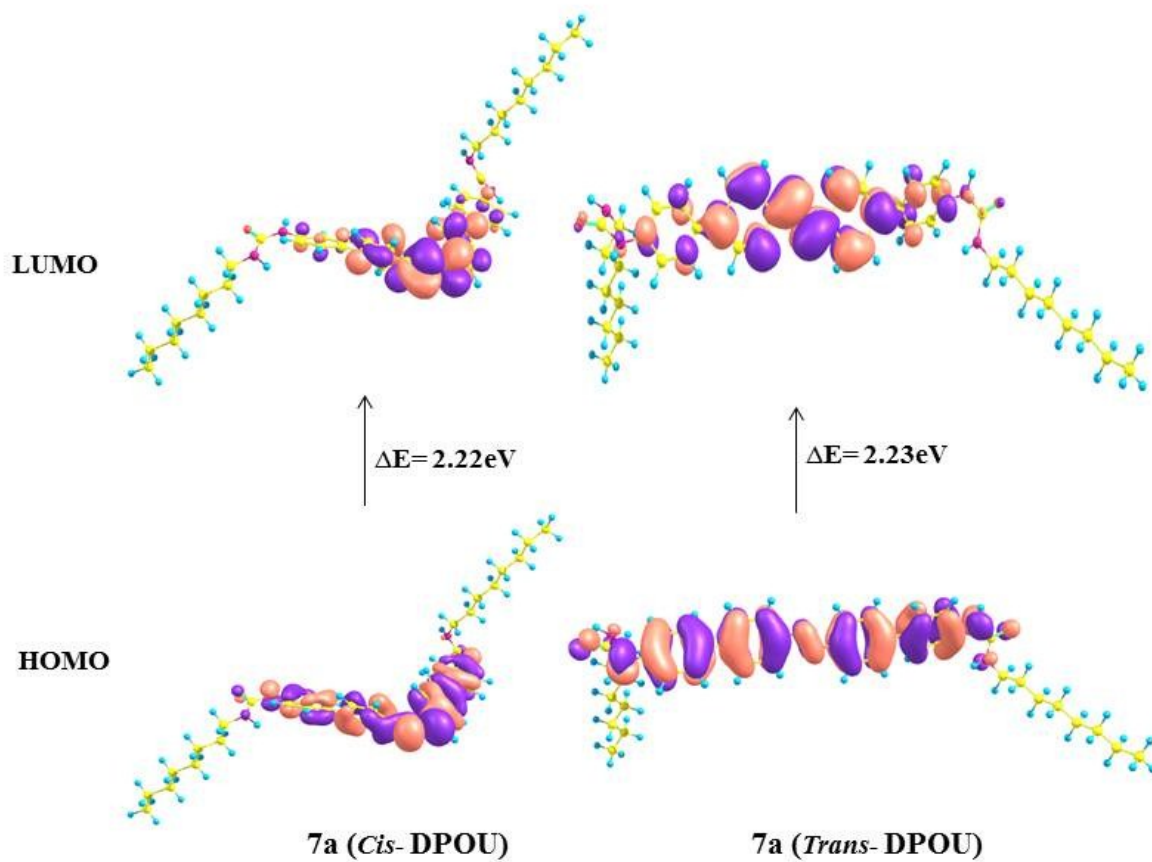

**Fig. S8** DFT-computed molecular frontier orbitals of **7a**.

**Table 3.** TD-DFT electronic transitions of all the compounds.

| Compounds         | wavelength (nm) | Oscillator strength (f) | Electronic transitions |
|-------------------|-----------------|-------------------------|------------------------|
| <i>Trans (7a)</i> | 443.17 nm       | 0.0014                  | HOMO-1 - LUMO          |
|                   | 374.57 nm       | 1.6996                  | HOMO - LUMO            |
|                   | 274.39 nm       | 0.0053                  | HOMO - LUMO            |
| <i>Cis (7a)</i>   | 466.28 nm       | 0.1449                  | HOMO-1 - LUMO          |
|                   | 355.40 nm       | 0.3474                  | HOMO - LUMO            |
|                   | 260.60 nm       | 0.1014                  | HOMO - LUMO            |
| <i>Trans (7b)</i> | 454.00 nm       | 0.0011                  | HOMO-1 - LUMO          |
|                   | 367.99 nm       | 1.6999                  | HOMO - LUMO            |
|                   | 261.00 nm       | 0.0406                  | HOMO - LUMO            |
| <i>Cis (7b)</i>   | 474.35 nm       | 0.1306                  | HOMO-1 - LUMO          |
|                   | 363.17 nm       | 0.2631                  | HOMO - LUMO            |
|                   | 257.11 nm       | 0.1852                  | HOMO - LUMO            |



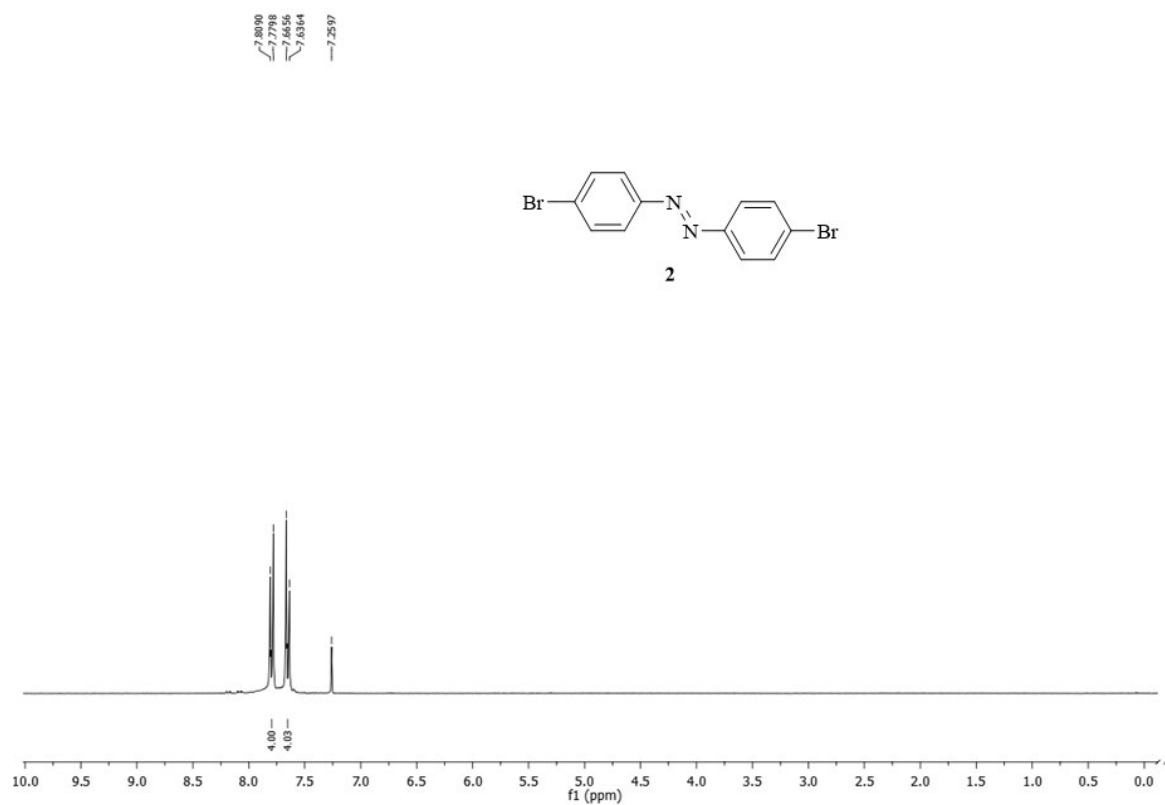

Fig. S9 <sup>1</sup>H NMR Spectrum of Compound 2.

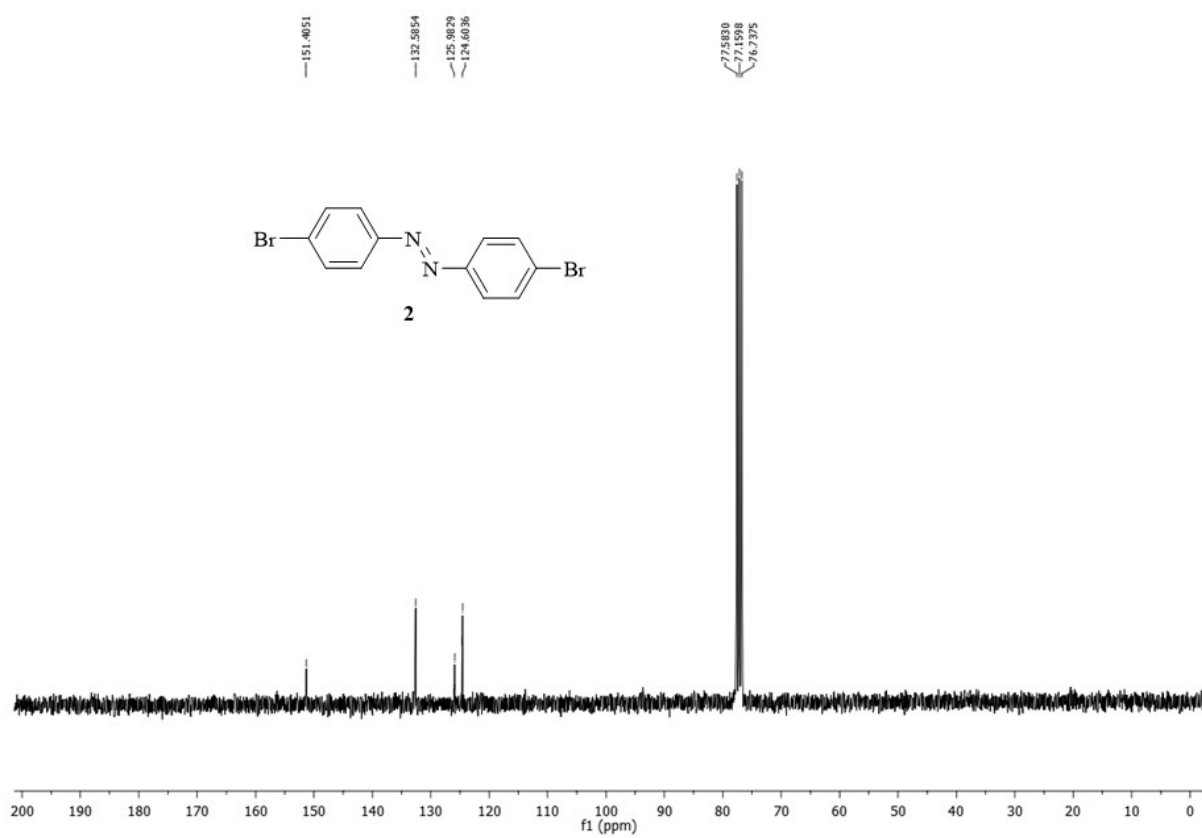

Fig. S10 <sup>13</sup>C NMR Spectrum of Compound 2.

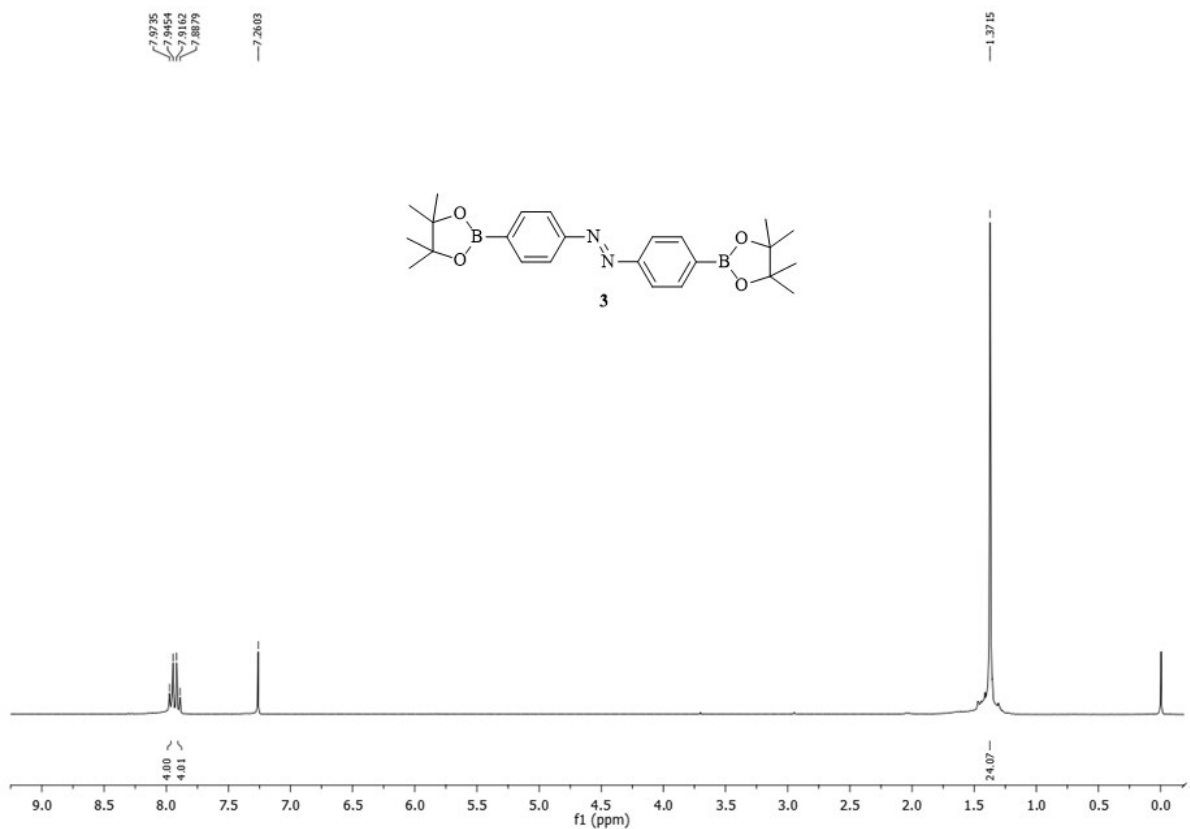

Fig. S11 <sup>1</sup>H NMR Spectrum of Compound 3.

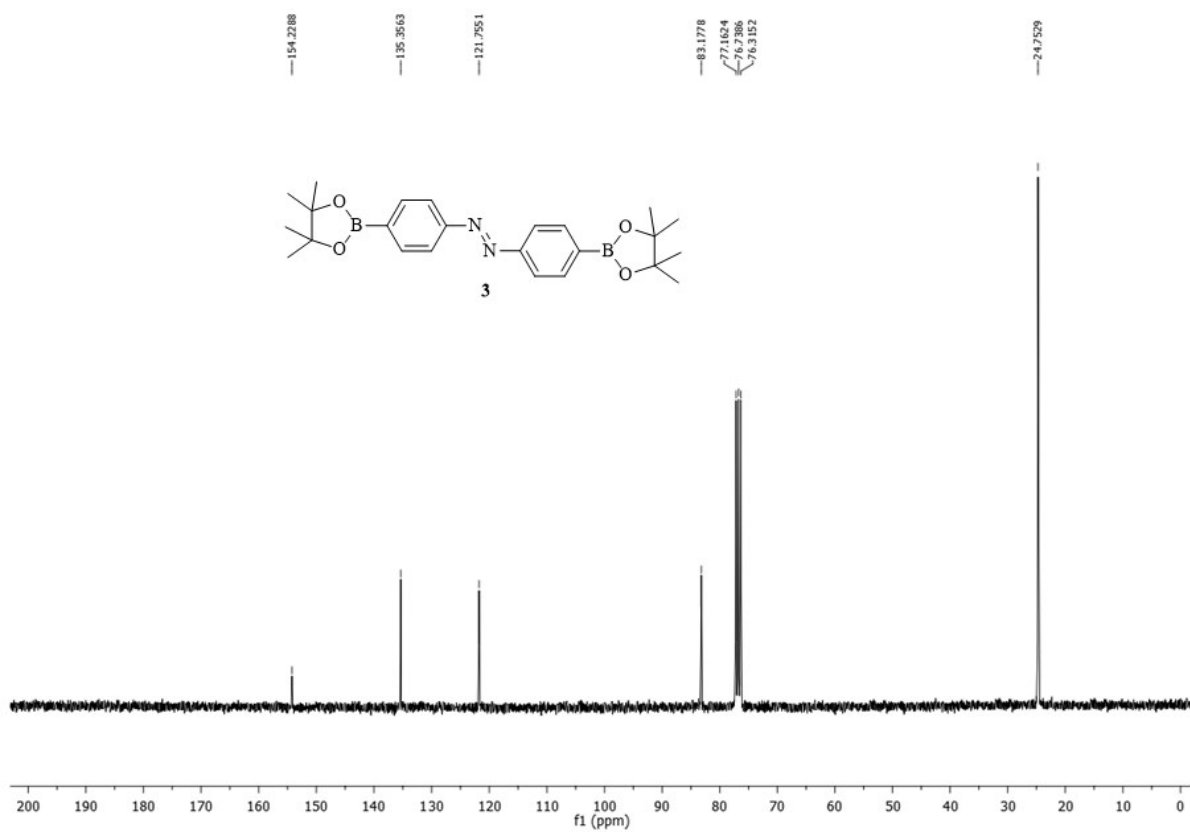

Fig. S12 <sup>13</sup>C NMR Spectrum of Compound 3.

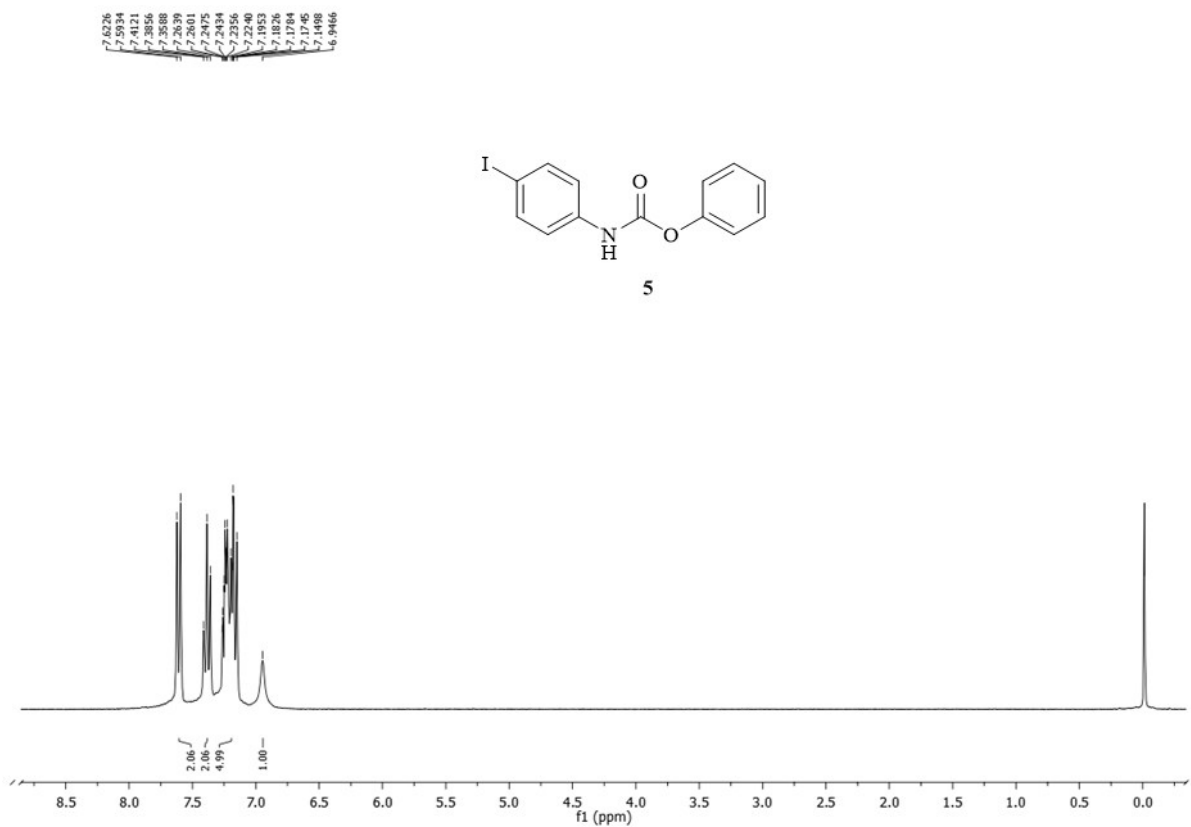

Fig. S13  $^1\text{H}$  NMR Spectrum of Compound 5.

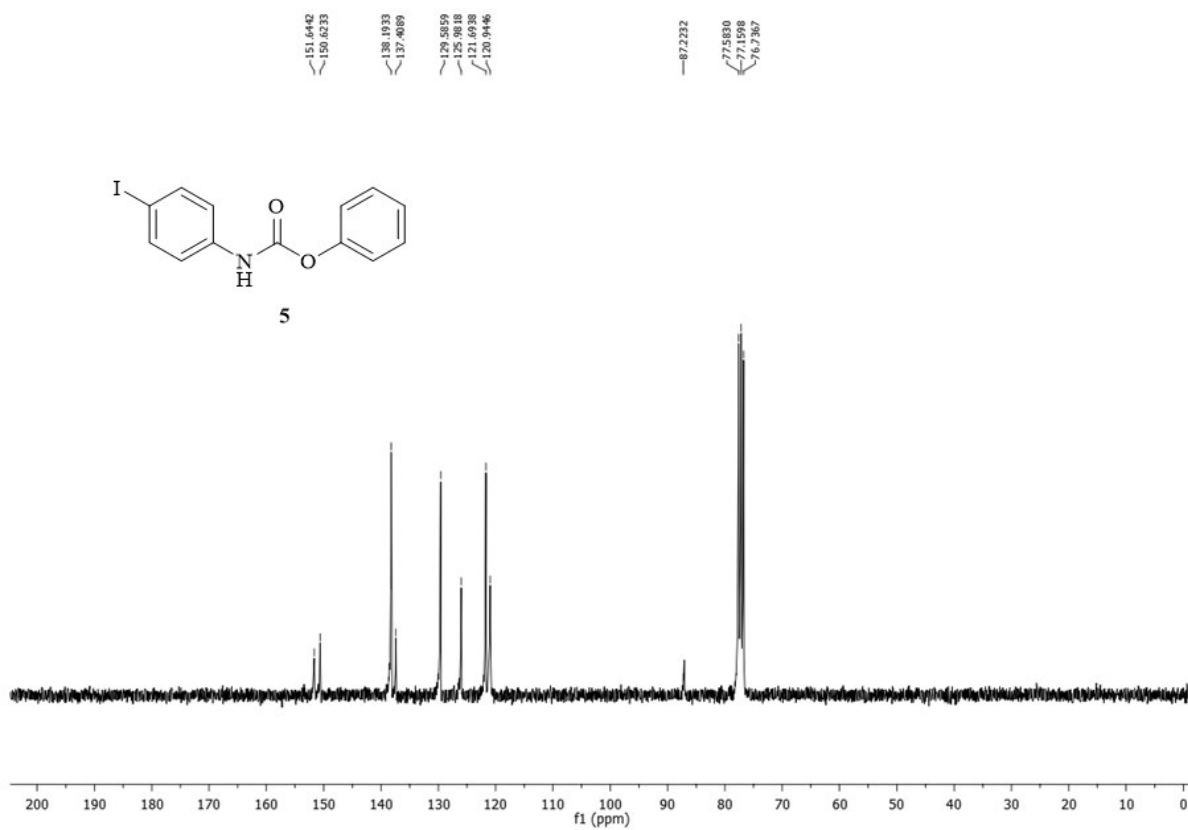

Fig. S14  $^{13}\text{C}$  NMR Spectrum of Compound 5.

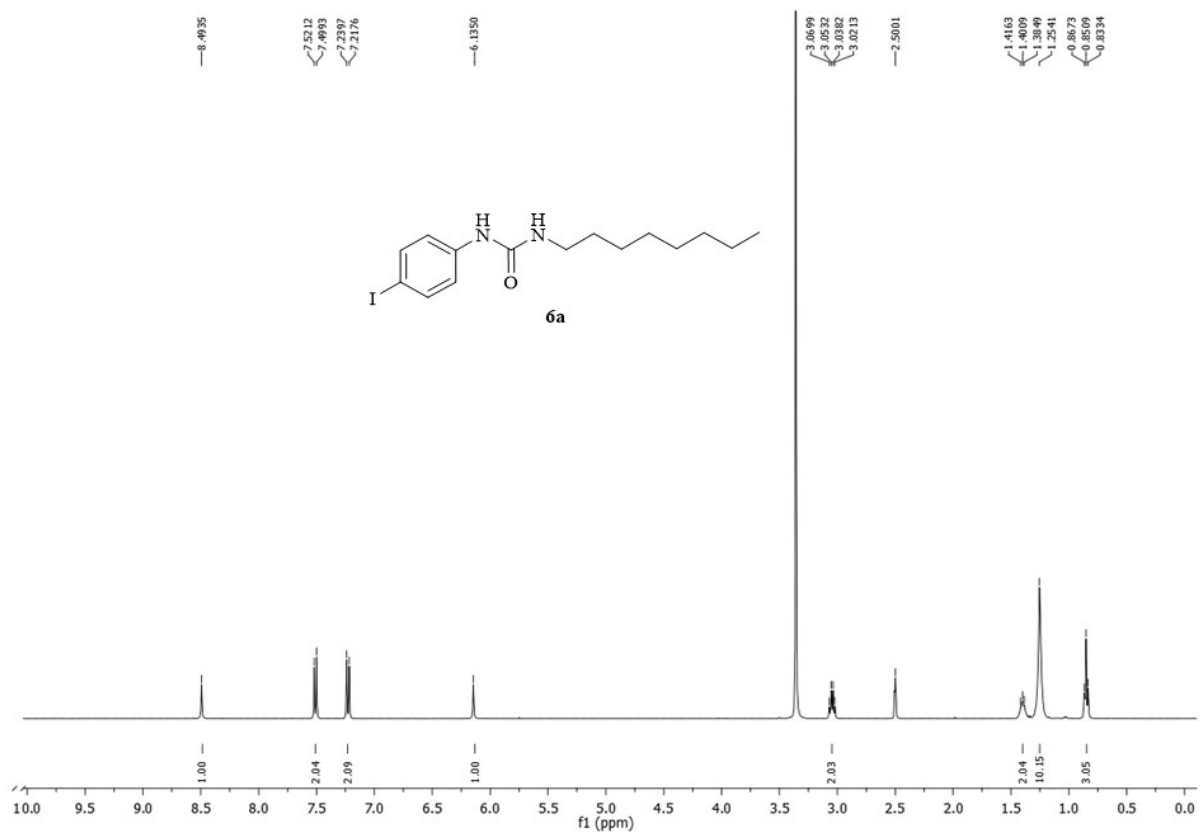

Fig. S15 <sup>1</sup>H NMR Spectrum of Compound 6a.

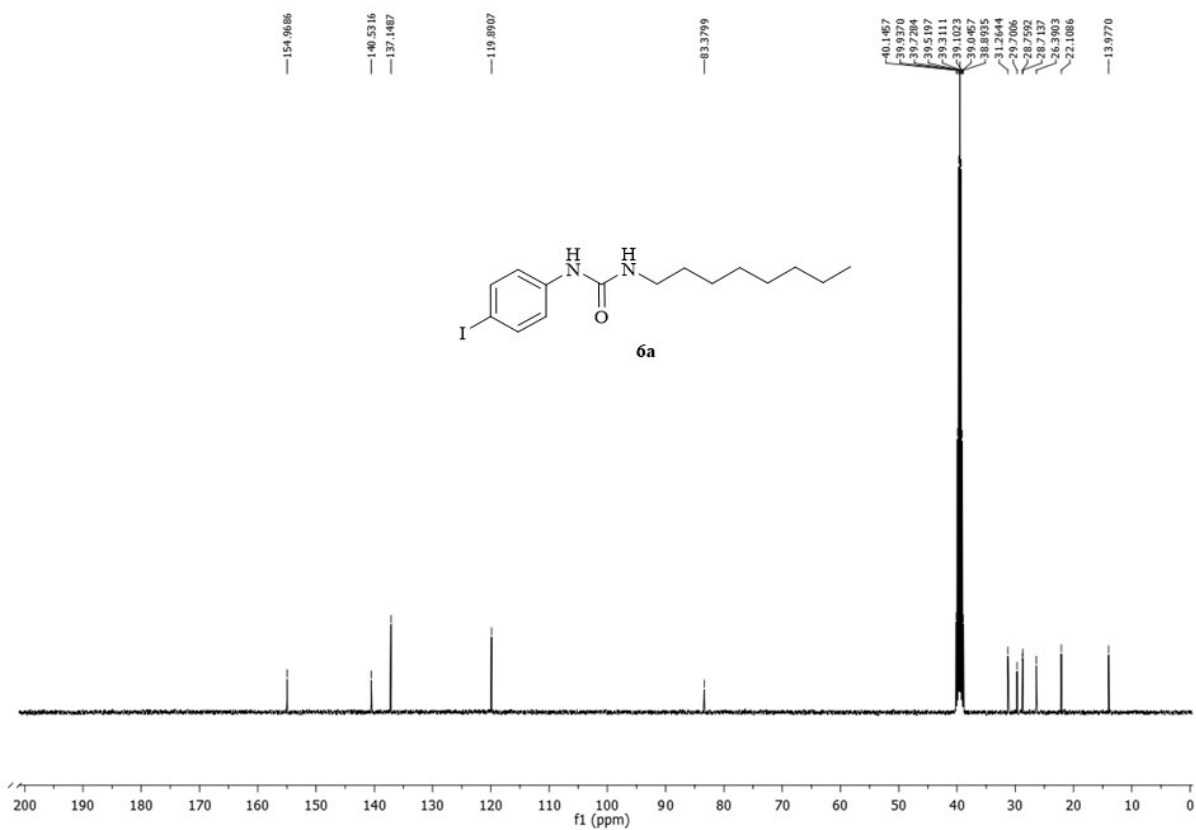

Fig. S16 <sup>13</sup>C NMR Spectrum of Compound 6a.

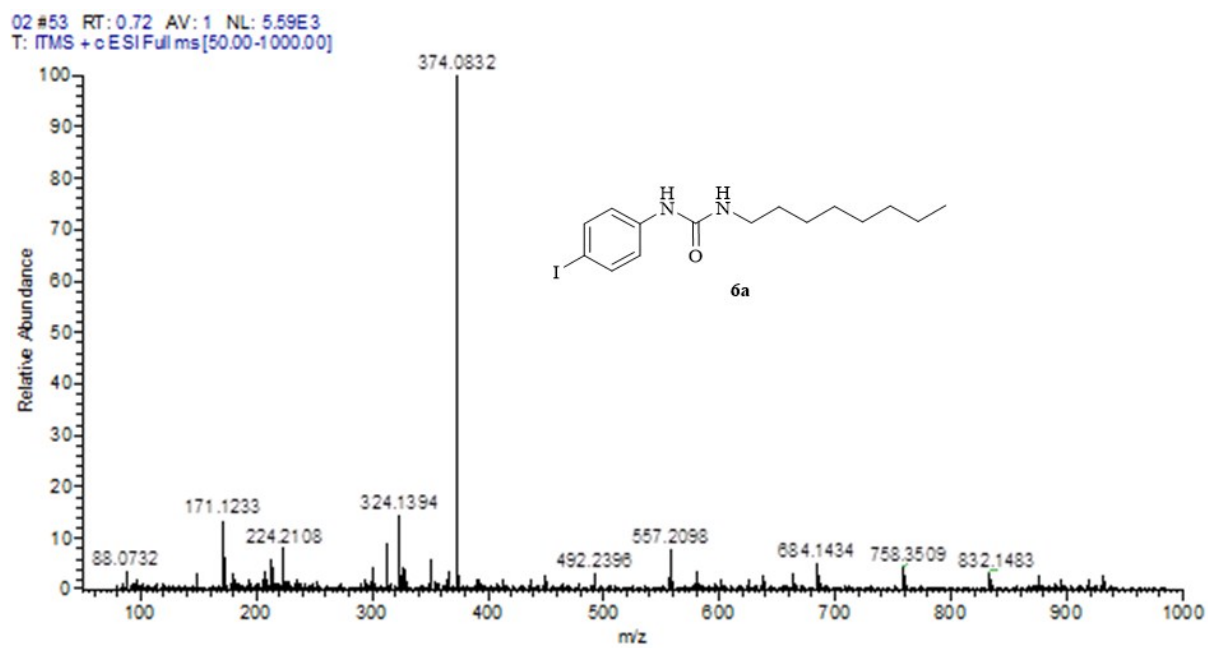

Fig. S17 ESI - Mass Spectrum of Compound **6a**.

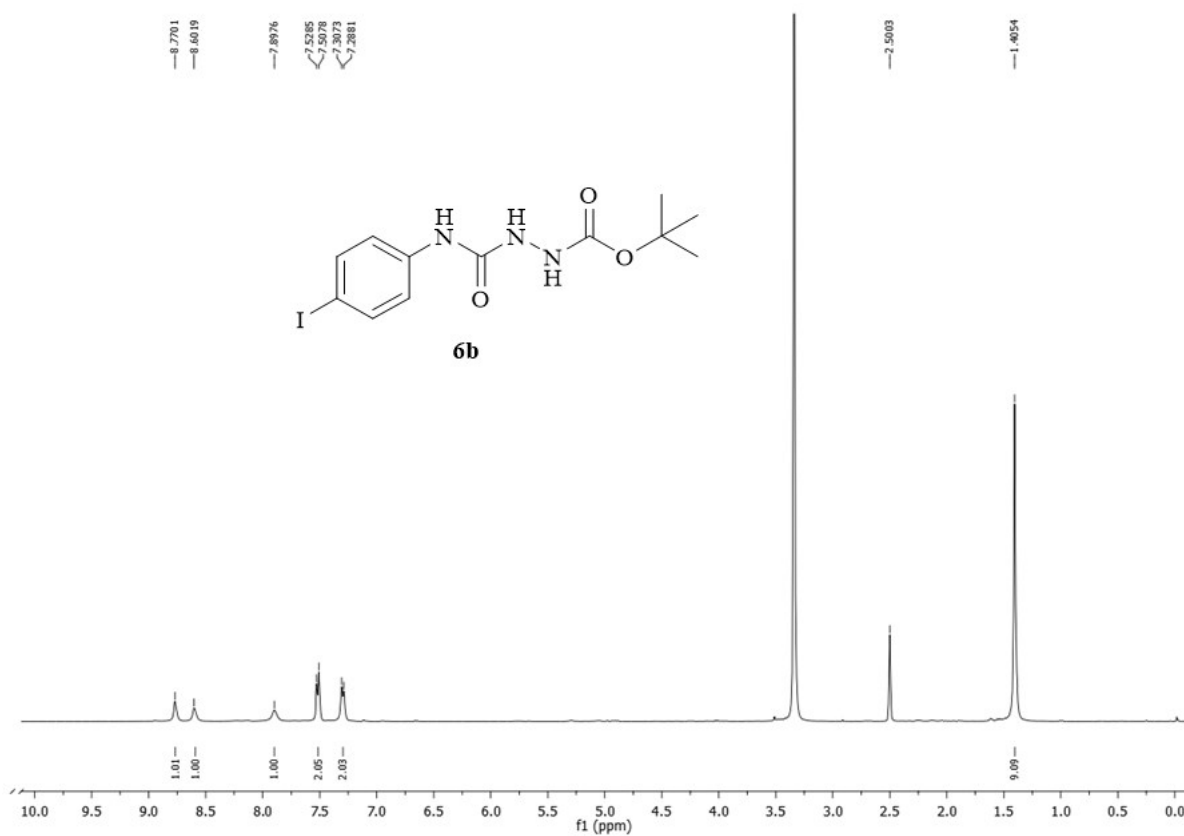

Fig. S18  $^1\text{H}$  NMR Spectrum of Compound **6b**.

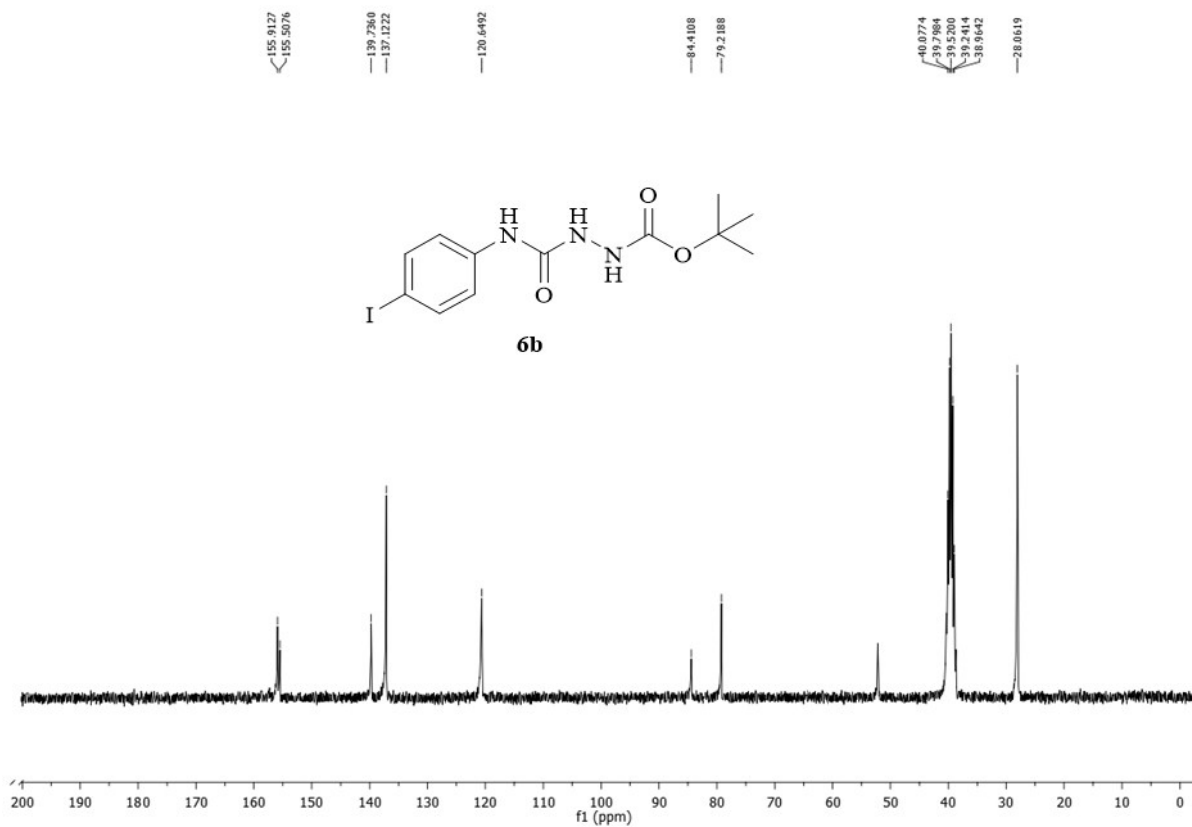

**Fig. S19** <sup>13</sup>C NMR Spectrum of Compound **6b**.

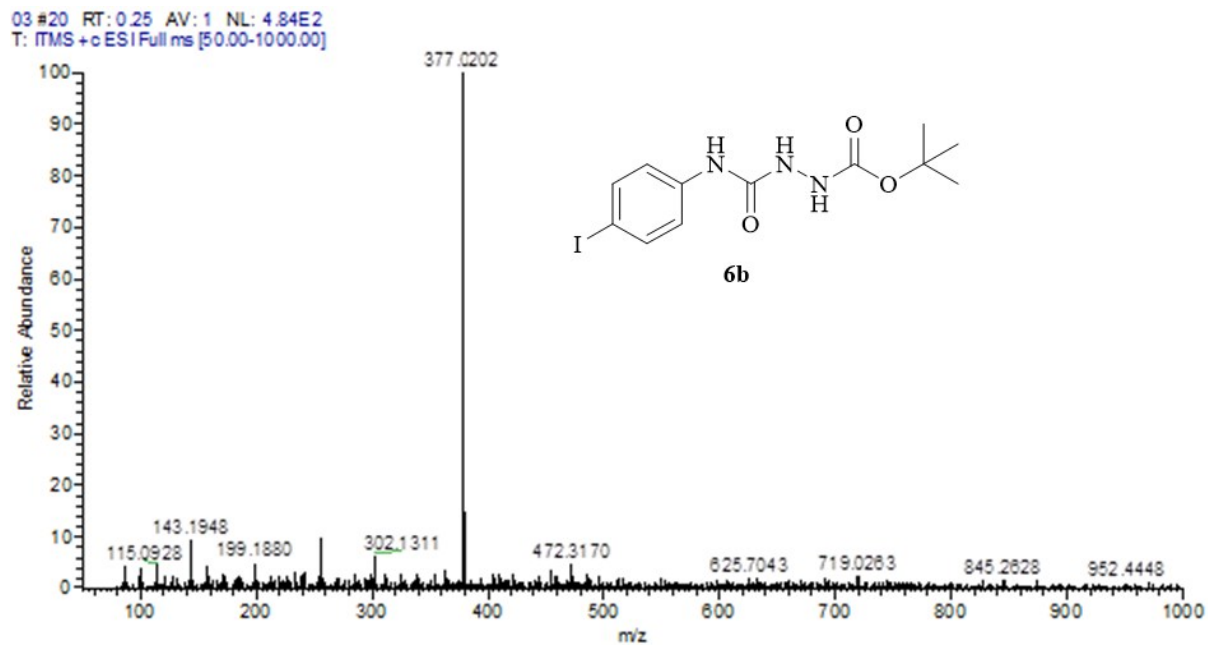

**Fig. S20** ESI - Mass Spectrum of Compound **6b**.

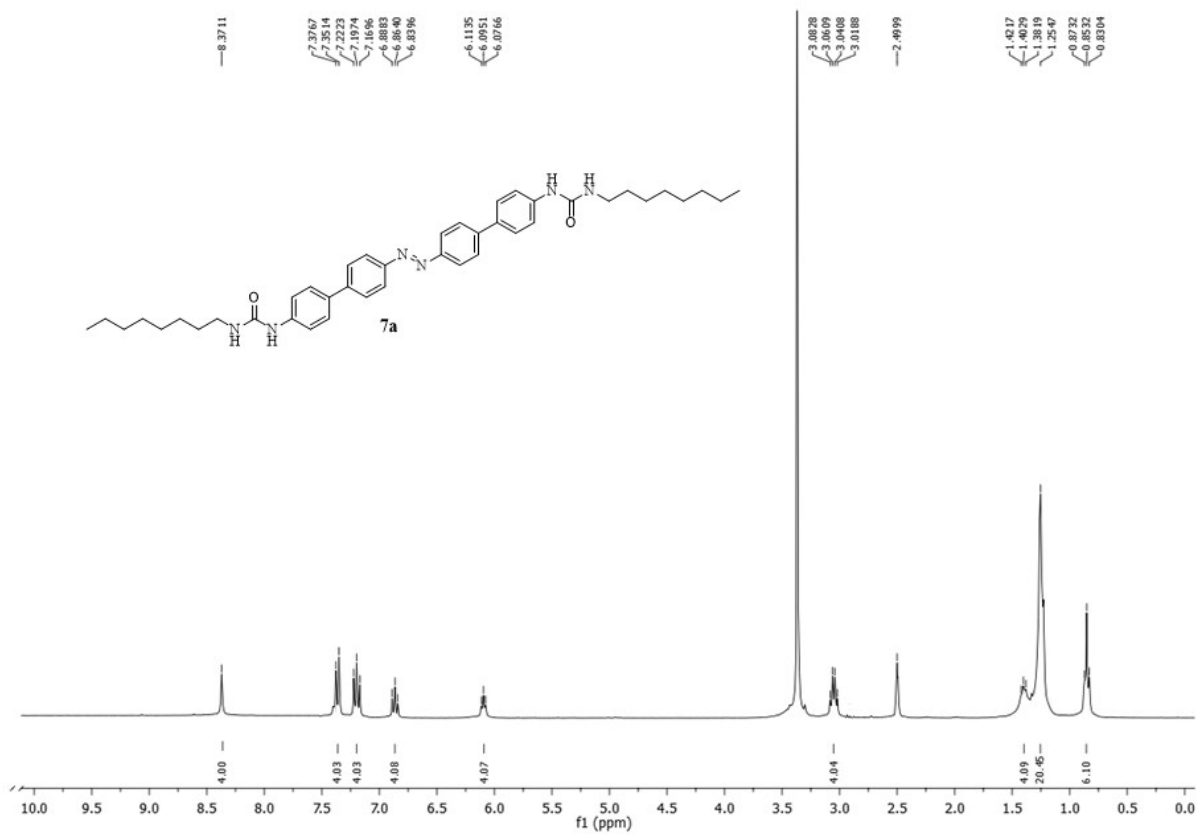

Fig. S21 <sup>1</sup>H NMR Spectrum of Compound 7a.

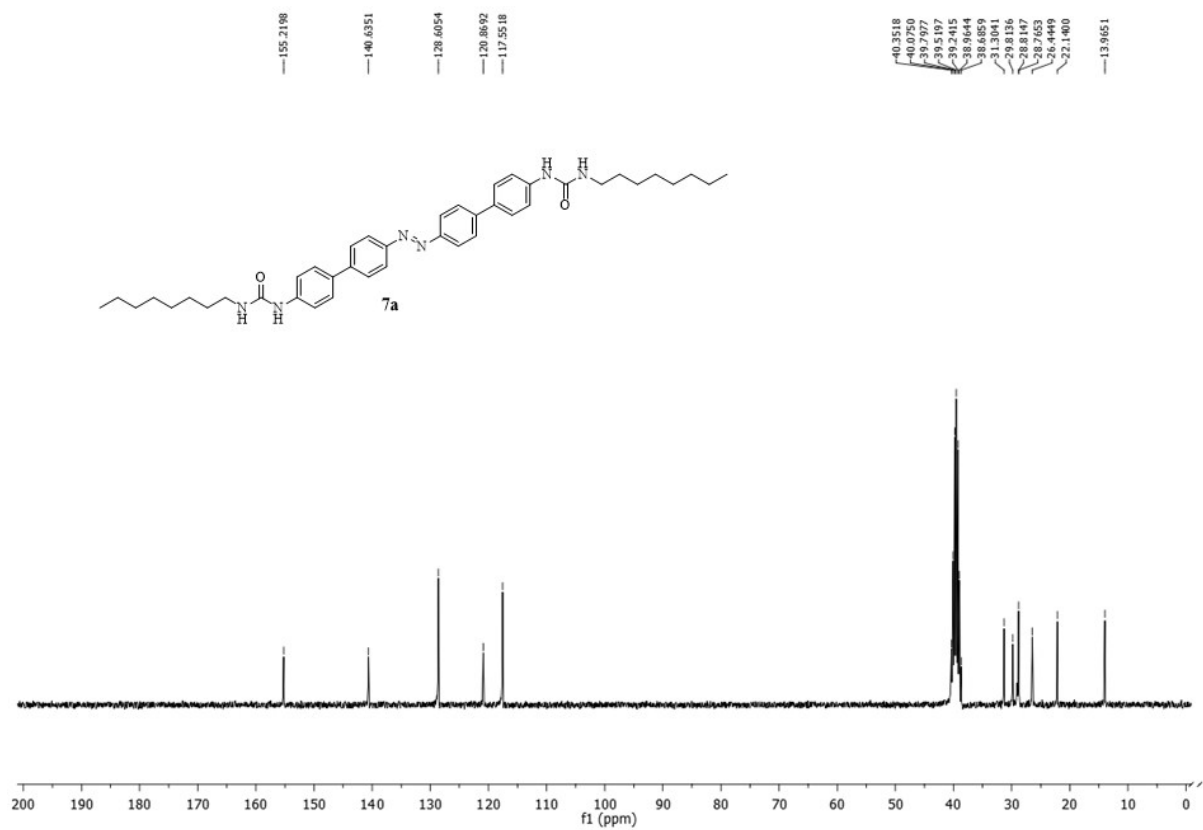

Fig. S22 <sup>13</sup>C NMR Spectrum of Compound 7a.

83D-7 #40 RT: 0.46 AV: 1 NL: 3.72E3  
T: ITMS + c ESI Full ms [50.00-1000.00]

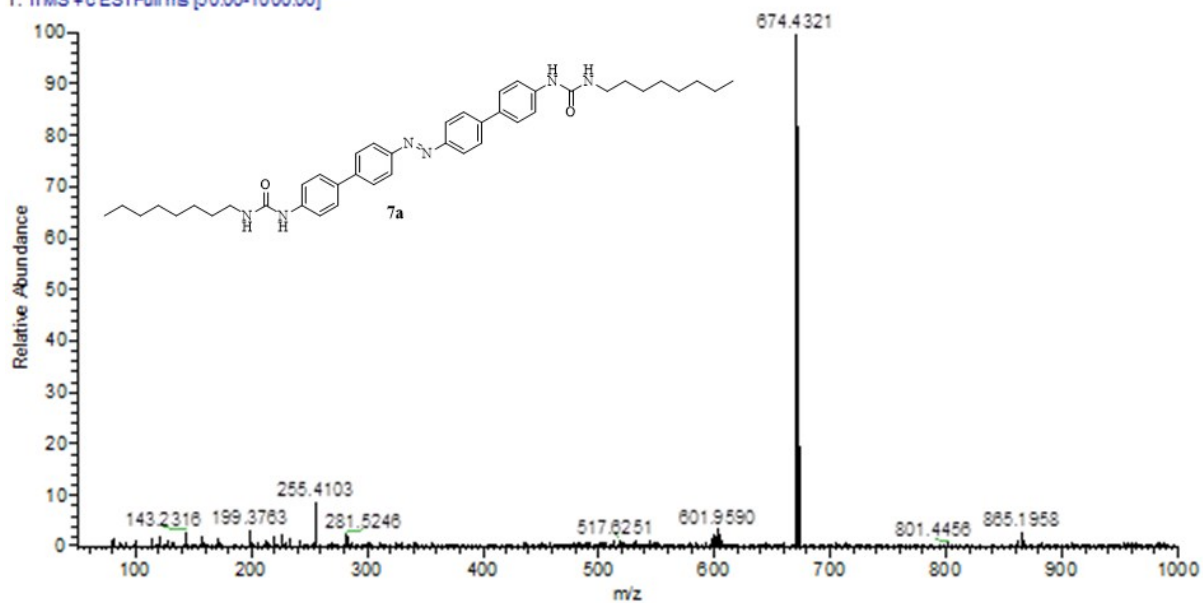

Fig. S23 ESI - Mass Spectrum of Compound 7a.

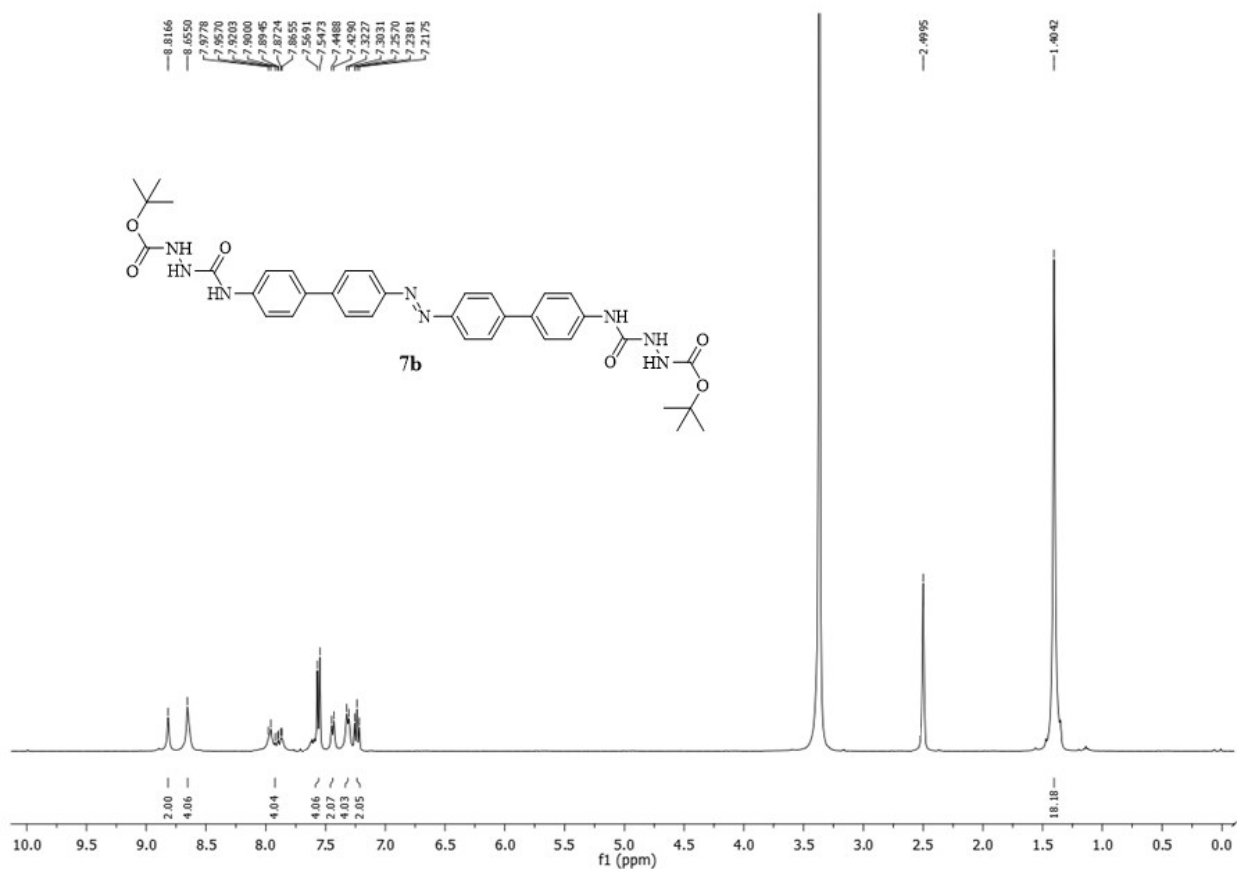

Fig. S24 <sup>1</sup>H NMR Spectrum of Compound 7b.



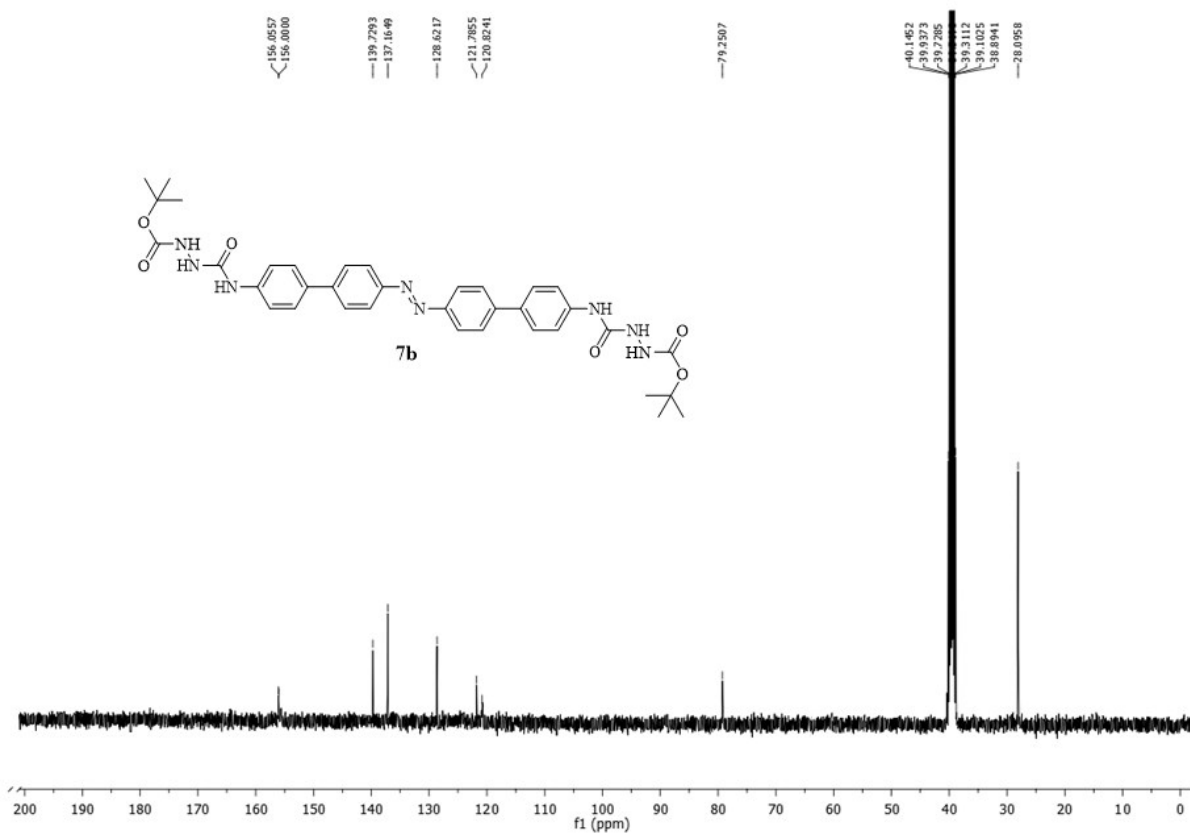

Fig. S25 <sup>13</sup>C NMR Spectrum of Compound 7b.

830-3 #7 RT: 0.09 AV: 1 NL: 5.98E3  
T: ITMS + c ESI Full ms [50.00-1000.00]

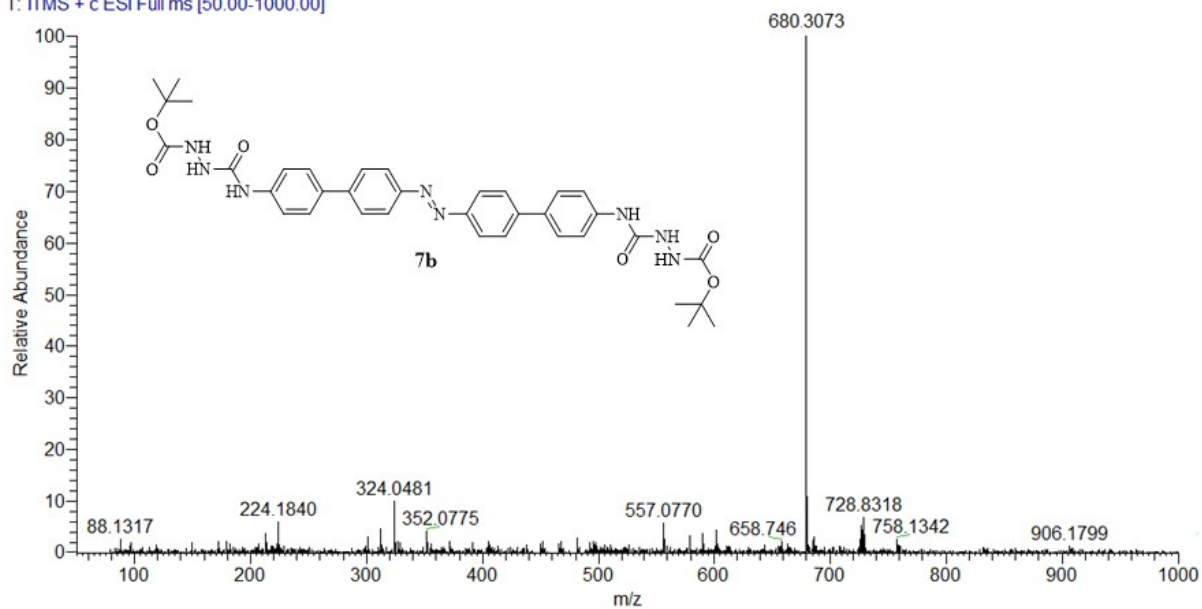

Fig. S26 ESI - Mass Spectrum of Compound 7b.
